# Supplementary material for: FRA1 is essential for the maintenance of the oncogenic phenotype induced by in vitro long-term arsenic exposure
Source: Royal Society of Chemistry journal article supplement (doi:10.1039/d0mt00209g), 2020-11-20
Supplement: d0mt00209g1.pdf [file d0mt00209g1.pdf]

## SUPPLEMENTARY TABLES

**Table S1. Primers used for real-time RT-PCR gene expression evaluation**

| <b>Gene</b>  | <b>Forward (5'-3')</b> | <b>Reverse (5'-3')</b> |
|--------------|------------------------|------------------------|
| <i>Actb</i>  | GGAGAAGATCTGGCACCACA   | GCTCGGTCAGGATCTTCATG   |
| <i>Fra1</i>  | CCAGCAGCAGAAGTTCCACC   | CAGCTGCTAGCTTGTTC CGC  |
| <i>Pdcd4</i> | CCTGAGCTAGCCTTGGACAC   | GGTGATTGACAGGCTGTTGC   |
| <i>Pten</i>  | CAGTGGCGGAACTTGCAATC   | CACACACAGGCAATGGCTGA   |
| <i>Slug</i>  | ACCAGAGATCCTCACCTCGG   | GCTGCAGTCTCTCCTCTCG    |
| <i>Snail</i> | GAGTTCACCTTCCAGCAGCC   | AGGTGGACGAGAAGGACGAC   |
| <i>Tgfβ1</i> | TACCTTGTAACCGGCTGCT    | CCGGTTCATGTCATGGATGG   |
| <i>Tgfβ2</i> | GCTCTCCTTCGACGTGACAG   | CGGCTGGACTGTTGTGACTC   |
| <i>Tpm1</i>  | GCCACAGATGCTGAAGCTGA   | TCGCTCTCGATGATGACCAG   |
| <i>Twist</i> | CAGTCGTACGAGGAGCTGCA   | ACGGAGAAGGCGTAGCTGAG   |
| <i>Zeb1</i>  | GCCAGTGAAGGTGATCCAGC   | TCCACACTCGTGAGGCCTCT   |
| <i>Zeb2</i>  | CTTGCCTCCAGAGCTTGACC   | CATGAGGTTGCAGGACTGCC   |

**Table S2. Antibodies used for protein expression analysis by WB**

| <b>Target protein</b> | <b>Antibody reference</b>         |
|-----------------------|-----------------------------------|
| <b>ERK1</b>           | ab32537 (Abcam)                   |
| <b>P-ERK1/2</b>       | ab50011 (Abcam)                   |
| <b>FRA1</b>           | sc-183 (Santa Cruz Biotechnology) |
| <b>P-FRA1</b>         | 3880 (Cell Signalling)            |
| <b>GAPDH</b>          | ab9485 (Abcam)                    |
| <b>JNK1/2/3</b>       | ab208035 (Abcam)                  |
| <b>P-JNK1/2/3</b>     | ab124956 (Abcam)                  |
| <b>p38</b>            | ab17009 (Abcam)                   |
| <b>P-p38</b>          | ab195049 (Abcam)                  |
| <b>RAS</b>            | 05-516 (Millipore)                |
| <b>cMET</b>           | Ab59884 (Abcam)                   |
| <b>Vinculin</b>       | ab18058 (Abcam)                   |
